# Supplementary material
Source: PubMed Central journal article supplement (PMC4396031)
Supplement: ajcr0005-0530-f7.pdf [file ajcr0005-0530-f7.pdf]

## ER- $\alpha$ 36 in tamoxifen resistance of HER2 overexpressing breast cancer cells

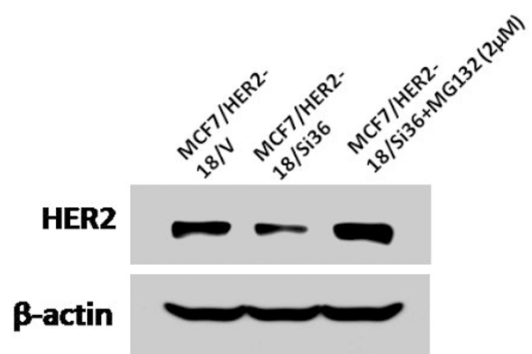

**Supplementary data.** Proteasome inhibitor MG132 restores HER2 expression in MCF/HER2-18 cells with knocked-down levels of ER- $\alpha$ 36 expression. Western blot analysis of the expression of HER2 in MCF7/HER2-18 cells treated with 2  $\mu$ M of MG132 for 12 hours.
